# Supplementary figures and images for: The Gut Microbiome Modulates Colon Tumorigenesis
Source: PubMed Central journal article supplement — mBio. 2013 Nov 5;4(6):e00692-13. doi: 10.1128/mBio.00692-13 (PMC3892781; doi:10.1128/mbio.00692-13), 2013-11-05

**A**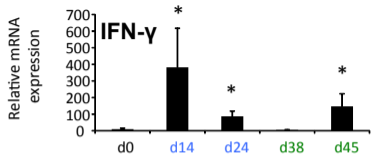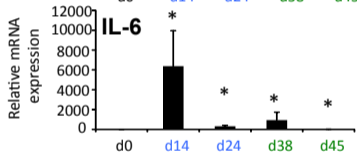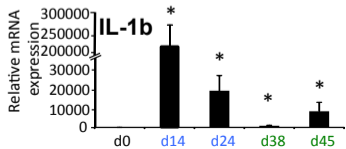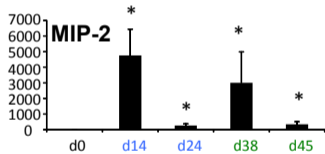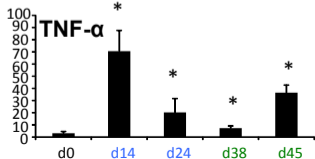**B**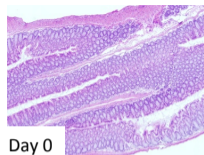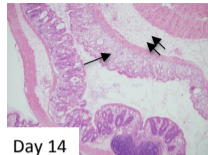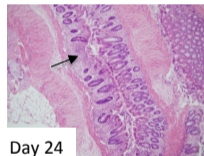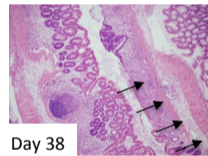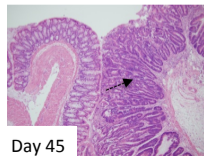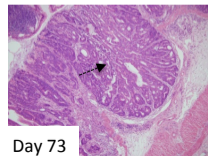

Supplement: mbo005131655sf01.pdf [file mbo005131655sf01.pdf]

Fold change vs. No Antibiotics

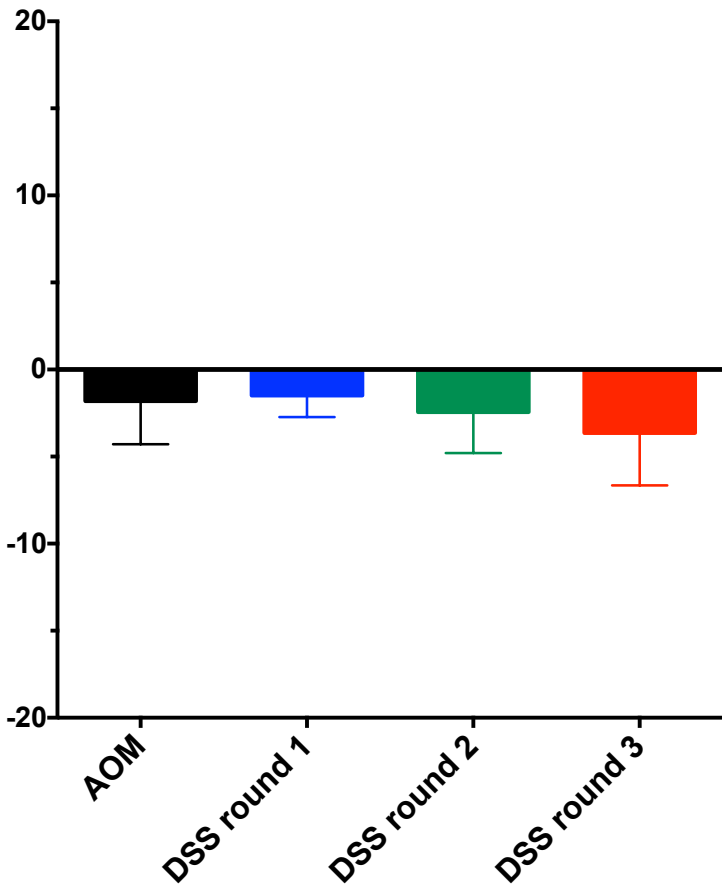

Supplement: mbo005131655sf02.pdf [file mbo005131655sf02.pdf]

**A**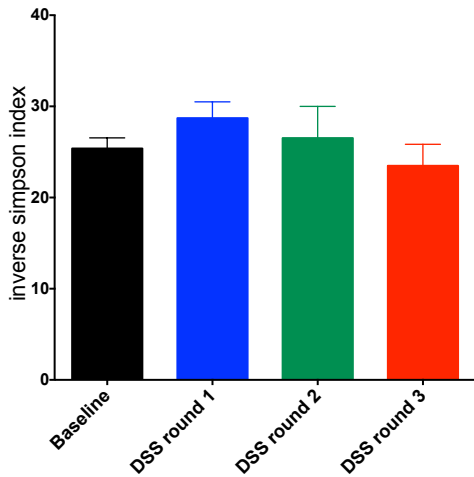**B**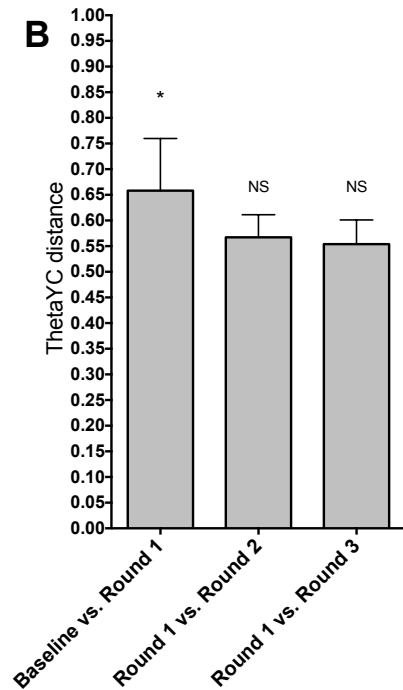

Supplement: mbo005131655sf03.pdf [file mbo005131655sf03.pdf]

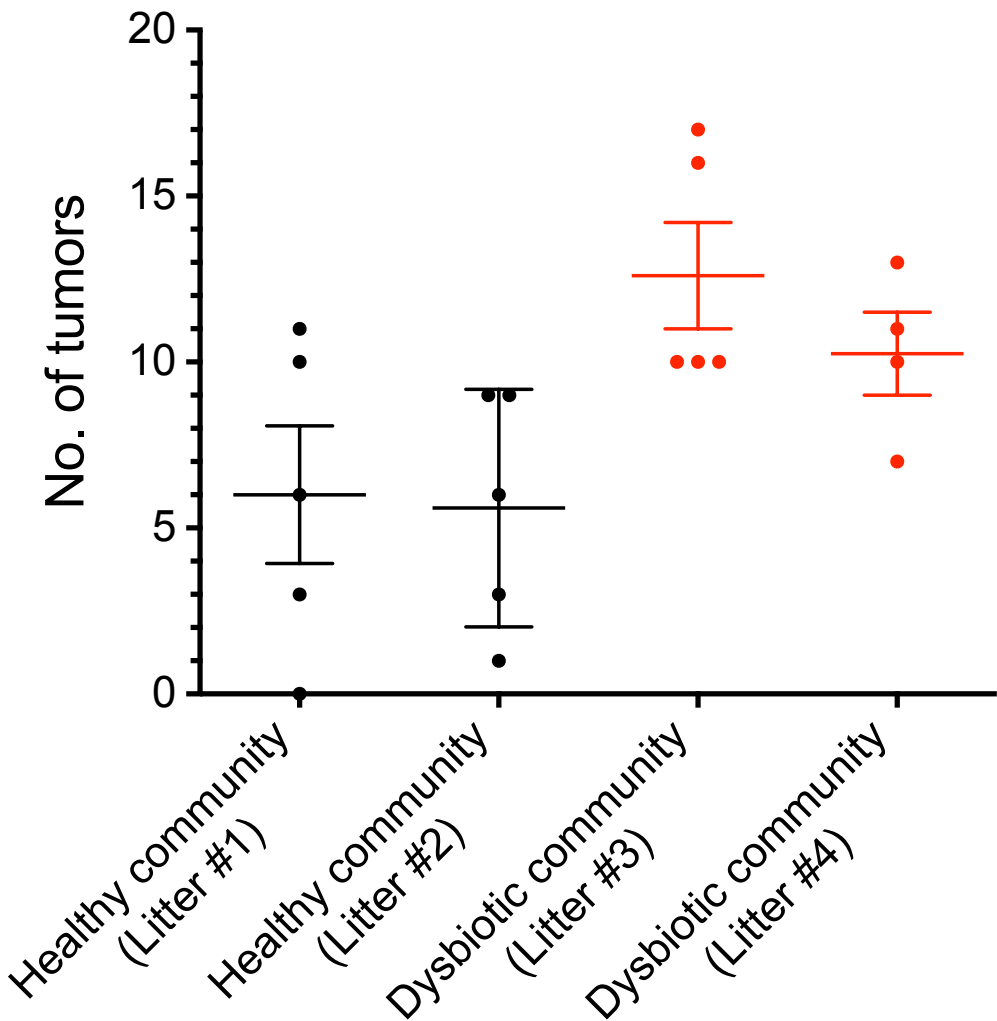

Supplement: mbo005131655sf04.pdf [file mbo005131655sf04.pdf]

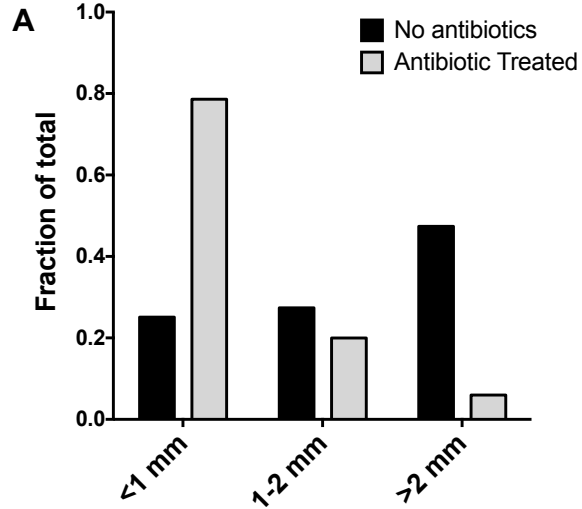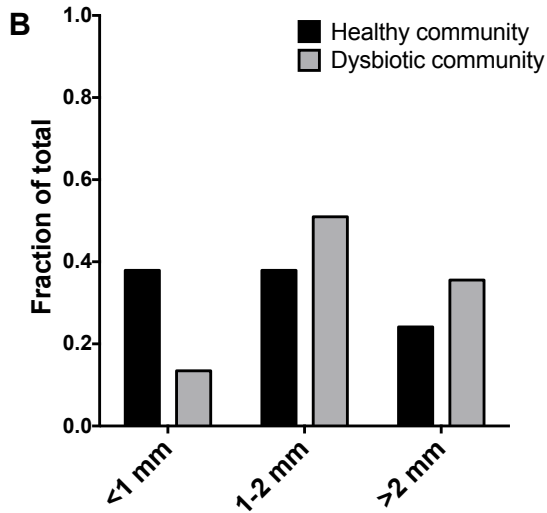

Supplement: mbo005131655sf05.pdf [file mbo005131655sf05.pdf]
